# Supplementary material for: Evaluation of the Polygenic Risk Score for Alzheimer’s Disease in Russian Patients with Dementia Using a Low-Density Hydrogel Oligonucleotide Microarray
Source: MDPI journal article supplement (doi:10.3390/ijms241914765), 2023-09-29
Supplement: s1 [file s1]

**Table S2.** Comparison of logistic regression models including social or social and genetic factors.

| Model          | Deviance | AIC     | BIC     | df  | X <sup>2</sup> | <i>p-value</i> | McFadden R <sup>2</sup> | Nagelkerke R <sup>2</sup> | Tjur R <sup>2</sup> | Cox & Snell R <sup>2</sup> |
|----------------|----------|---------|---------|-----|----------------|----------------|-------------------------|---------------------------|---------------------|----------------------------|
| H <sub>0</sub> | 361.594  | 369.594 | 384.991 | 343 |                |                |                         |                           |                     |                            |
| H <sub>1</sub> | 348.007  | 360.007 | 383.103 | 341 | 13.587         | 0.001          | 0.038                   | 0.059                     | 0.126               | 0.038                      |

**H<sub>0</sub>** contains the following predictors: the presence of a family, higher education and intellectual work

**H<sub>1</sub>**, in addition to predictors from H<sub>0</sub>, contains genetic factors (polygenic risk score and *APOE-ε4*)
