# Supplementary material for: Evaluation of the Polygenic Risk Score for Alzheimer’s Disease in Russian Patients with Dementia Using a Low-Density Hydrogel Oligonucleotide Microarray
Source: MDPI journal article supplement (doi:10.3390/ijms241914765), 2023-09-29
Supplement: s1 [file s1]

# Supplementary file 1. Identification of genetic markers associated with the risk of Alzheimer's disease using DNA microarray

Microarray layout:

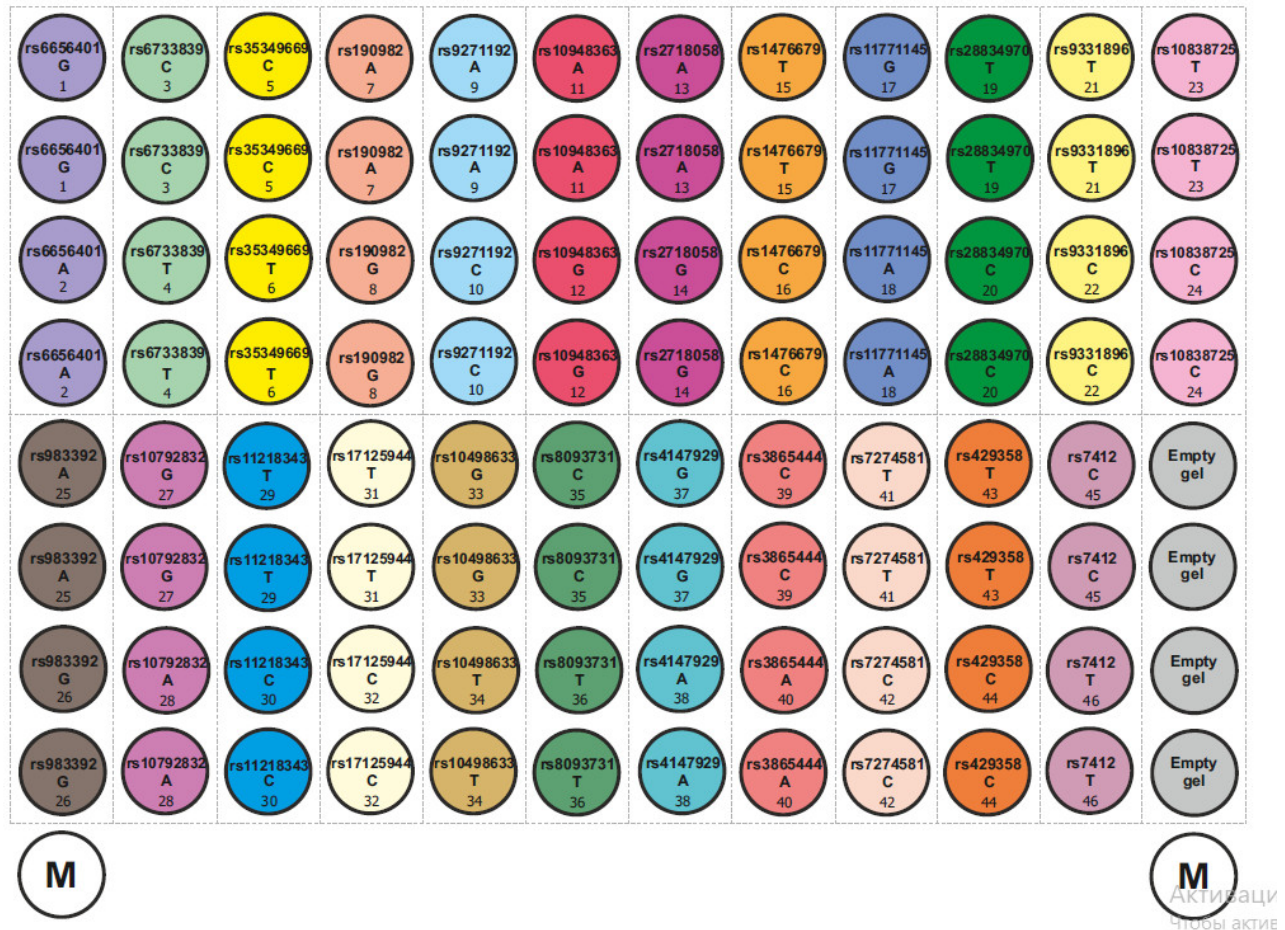

List of oligonucleotides for immobilization on the microarray

|    | Gene       | SNP        | Reference Allele | Effect Allele | Sequence, 5'-3'        |
|----|------------|------------|------------------|---------------|------------------------|
| 1  | CR1        | rs6656401  | G                | A             | ATCTTCTCGTCGCCTTC      |
| 2  |            |            |                  |               | ATCTTCTCATCGCCTTCT     |
| 3  | BIN1       | rs6733839  | C                | T             | TTCTTAAAAACACCCTTTTCC  |
| 4  |            |            |                  |               | TTCTTAAAAATACCCTTTTCC  |
| 5  | INPP5D     | rs35349669 | C                | T             | TGATAGCTTCCCACTGAG     |
| 6  |            |            |                  |               | TGATAGCTTTCCCACTGAGT   |
| 7  | MEF2C      | rs190982   | A                | G             | CTCAAAGATAAACCAGGACA   |
| 8  |            |            |                  |               | CTCAAAGATGAACCAGGAC    |
| 9  | HLA-DRB5/1 | rs9271192  | A                | C             | CCCCTCTCATAAAAAGTCATA  |
| 10 |            |            |                  |               | CCCTCTCATACAAAGTCATA   |
| 11 | CD2AP      | rs10948363 | A                | G             | GGGCAAAACAAATTTTGTTA   |
| 12 |            |            |                  |               | GGGCAAAACGAATTTTGTT    |
| 13 | NME8       | rs2718058  | A                | G             | TTTTTCCTGTTAATTTCTATCT |

|    |            |            |   |   |                        |
|----|------------|------------|---|---|------------------------|
| 14 |            |            |   |   | TTTTTCCTGTTGATTTCTATC  |
| 15 | ZCWPW1     | rs1476679  | T | C | GATCCTGTTATGGACTCCT    |
| 16 |            |            |   |   | ATCCTGTTACGGACTCCT     |
| 17 | EPHA1      | rs11771145 | G | A | TAAACTTTATGAAACGGAATC  |
| 18 |            |            |   |   | TAAACTTTATAAAACGGAATCA |
| 19 | PTK2B      | rs28834970 | T | C | GTGGAATTGTACAACACTG    |
| 20 |            |            |   |   | TGGAATTGCACAACACTG     |
| 21 | CLU        | rs9331896  | T | C | ACAGCTTTGTGGAGGA       |
| 22 |            |            |   |   | ACAGCTTCGTGGAGGA       |
| 23 | CELF1      | rs10838725 | T | C | GCCAACATTGCACCAC       |
| 24 |            |            |   |   | AGCCAACACTGCACCA       |
| 25 | MS4A6A     | rs983392   | A | G | CTAAAATTCCACATGCAATTTT |
| 26 |            |            |   |   | CTAAAATTCCACGTGCAATTTT |
| 27 | PICALM     | rs10792832 | G | A | AAAAATGTAGGAGCAAAACA   |
| 28 |            |            |   |   | GAAAAATGTAGAAGCAAAACA  |
| 29 | SORL1      | rs11218343 | T | C | AGCCGGTAATAGAGTATTTT   |
| 30 |            |            |   |   | AGCCGGTAACAGAGTATTT    |
| 31 | FERMT2     | rs17125944 | T | C | GTTTCAGATCTCCTTGATAG   |
| 32 |            |            |   |   | TTTCAGATCCCCCTTGATAG   |
| 33 | RIN-SLC24A | rs10498633 | G | T | CTCTCAGTCAGTAAACAGTT   |
| 34 |            |            |   |   | CTCTCAGTCATTAAACAGTTA  |
| 35 | DSG2       | rs8093731  | C | T | TCTAATGCCACTCAAGCT     |
| 36 |            |            |   |   | TTCTAATGCTACTCAAGCT    |
| 37 | ABCA7      | rs4147929  | G | A | GCCCATTGTGCCCCT        |
| 38 |            |            |   |   | TGCCCATTATGCCCCT       |
| 39 | CD33       | rs3865444  | C | A | TAAACACCCCATGGATCT     |
| 40 |            |            |   |   | TAAACACCCAATGGATCTA    |
| 41 | CASS4      | rs7274581  | T | C | TCTGGCCTGGCGCG         |
| 42 |            |            |   |   | TCTGGCCCGGCGC          |
| 43 | APOE       | rs429358   | T | C | AGGACGTGTGCGGC         |
| 44 |            |            |   |   | GGACGTGCGCGGC          |
| 45 |            | rs7412     | C | T | TGCAGAAGCGCCTGG        |
| 46 |            |            |   |   | GCAGAAGTGCCTGGC        |

### Multiplex PCR

Amplification was carried out in two rounds in the same reaction volume. At the first round, PCR products were generated using locus-specific primers (See Table below) and human genomic DNA as a template. The reaction mixture (25 µl in total) contained 5×PCR Buffer (Asfogen, Ltd, Moscow, Russia), dNTPs (Evrogen, LLC, Moscow, Russia), 5 units of HotTaq Multi DNA polymerase (Asfogen, Ltd, Moscow, Russia), 1 µl of human genomic DNA with typical concentrations of 20-60 ng/µl, and mixture of corresponding forward and reverse primers (see Table below). For the second round of amplification, PCR fragments obtained at

the 1<sup>st</sup> round were used as a template. A universal Cy5-fluorescently labeled Uni-Cy5 primer was used (see Table below) to yield predominantly single-stranded fluorescently labeled PCR products. PCR was carried out in an S1000 thermal cycler (Bio-Rad, Hercules, CA, USA) under the following conditions: denaturation for 3 min at 95°C, 50 cycles at 95°C - 30 s, 65°C - 30 s, 67°C - 30 s, 69°C - 30 s, 72°C - 20 s, then 50 cycles at 95° C - 20 s, 56° C - 10 s, 72° C - 30 s. The PCR product mixture after the 2<sup>nd</sup> round of amplification containing predominantly single-stranded fluorescently labeled fragments was used for hybridization on microarray.

*List of primers used in multiplex PCR*

| Gene           | SNP        | Direction | Sequence, 5'-3'                                         | Concentration in the reaction mixture (mM) |
|----------------|------------|-----------|---------------------------------------------------------|--------------------------------------------|
| CR1            | rs6656401  | F         | ATCATTTCTTCTCTGTCTCCATCTTCTC                            | 0,04                                       |
|                |            | R         | tcattggatctcattaGAAGAGCAAAGGACACACACAGA<br>G            | 0,04                                       |
| BIN1           | rs6733839  | F         | AAAAGGAAAGAAATCTCTGTTCTGCTTC                            | 0,04                                       |
|                |            | R         | tcattggatctcattaCTAGTCTTCTCTGGTTCCTTCTTCTG              | 0,04                                       |
| INPP5D         | rs35349669 | F         | GGTGCAGGCCACAGTGATA                                     | 0,04                                       |
|                |            | R         | tcattggatctcattaCAGCCACCCCTGATGCTTT                     | 0,04                                       |
| MEF2C          | rs190982   | F         | CTTTTAAGTGTAGTTTTCTATGTGCTCTTCAC                        | 0,04                                       |
|                |            | R         | tcattggatctcattaTTAAAAAGACTTTAATAATTCCTGT<br>CCTGG      | 0,04                                       |
| HLA-<br>DRB5/1 | rs9271192  | F         | GGTATCTAAAGTAAAATTCCAATACCCCTCTCA                       | 0,04                                       |
|                |            | R         | tcattggatctcattaGAACCCCAAGGAGCTCTGATAAAG<br>TA          | 0,04                                       |
| CD2AP          | rs10948363 | F         | GGATTTGAGTATAAGTTCTAACTTCTTAGGGC                        | 0,04                                       |
|                |            | R         | tcattggatctcattaGGTCATTTTTCTAAACACAACACTT<br>TAGTTCCA   | 0,04                                       |
| NME8           | rs2718058  | F         | CTAGGTCTTTTCAGAGAACGAGCATTGG                            | 0,04                                       |
|                |            | R         | tcattggatctcattaAAATTACAACATAAATCAACACAG<br>TTGAAGATAGG | 0,04                                       |
| ZCWP<br>W1     | rs1476679  | F         | CAAAAAACGTCACATGGTACTTAGACTG                            | 0,04                                       |
|                |            | R         | tcattggatctcattaCCATTCTCCCGATCTGTTCTGGC                 | 0,04                                       |
| EPHA1          | rs11771145 | F         | CCTGACTTAAAACACCACGGAGTG                                | 0,04                                       |
|                |            | R         | tcattggatctcattaGACACCAAAGAATGCATATCAGAT<br>GATTCCG     | 0,04                                       |
| PTK2B          | rs28834970 | F         | TTATGGATCTGCCTTTTCTGGTCATTCC                            | 0,04                                       |
|                |            | R         | tcattggatctcattaGCTAAGTGAAAGCAGCCGTCGC                  | 0,04                                       |
| CLU            | rs9331896  | F         | CTCCGGTGGTCCAGACACAG                                    | 0,04                                       |
|                |            | R         | tcattggatctcattaCATTCAGCTCTTCCCTCCAGG                   | 0,04                                       |
| CELF1          | rs10838725 | F         | CTTCTGGAGACTGAGGCACGAGAATTA                             | 0,04                                       |
|                |            | R         | tcattggatctcattaCTTGTCGCCACGATGGAGTA                    | 0,04                                       |
| MS4A6<br>A     | rs983392   | F         | AGGAACAACAATTGAACAACAGGTGTTTC                           | 0,04                                       |
|                |            | R         | tcattggatctcattaGTTTTAGACAATAAGCTTGTGGTA<br>AGTTTCTAC   | 0,04                                       |
| PICAL<br>M     | rs10792832 | F         | GAGGCCACTTAAAGGAAGTGGGA                                 | 0,04                                       |
|                |            | R         | tcattggatctcattaGGCCATCCTTTCTCACACTTACAGC               | 0,04                                       |
| SORL1          | rs11218343 | F         | CACTGCACCCAGCCGGTAA                                     | 0,04                                       |

|                                  |            |   |                                                       |      |
|----------------------------------|------------|---|-------------------------------------------------------|------|
|                                  |            | R | tcattggatctcattaACTCAAACAAGGATGTGGGAACAT<br>GTG       | 0,04 |
| FERMT<br>2                       | rs17125944 | F | GCTTTTGTCTGGCCTAGTTTGTGG                              | 0,04 |
|                                  |            | R | tcattggatctcattaCTGGTACTGGTGCATGATTTTGCC              | 0,04 |
| RIN-<br>SLC24A                   | rs10498633 | F | CTTCAGGCACTTAGCAGACAAGATGAT                           | 0,04 |
|                                  |            | R | tcattggatctcattaCCATGGCTGTCCTGTTCTACCTG               | 0,04 |
| DSG2                             | rs8093731  | F | GACACTCTAAGGCGGGACTCAGTAATC                           | 0,04 |
|                                  |            | R | tcattggatctcattaTTCTAATTGGGATGTTAACAGTGGT<br>TTTCAAGC | 0,04 |
| ABCA7                            | rs4147929  | F | TGTCCCATTCTCACATTTGCCC                                | 0,04 |
|                                  |            | R | tcattggatctcattaGCCAGCATTGAGTGTGGAGCA                 | 0,04 |
| CD33                             | rs3865444  | F | CCCAGACACTCACACGGACC                                  | 0,04 |
|                                  |            | R | tcattggatctcattaACACCAGGGCTGATCACTGC                  | 0,04 |
| CASS4                            | rs7274581  | F | GTCAGACCGGGTAAGCAGCTTG                                | 0,04 |
|                                  |            | R | tcattggatctcattaGCCTCAGCCTCCCAAAGTGGAAG               | 0,04 |
| APOE                             | rs429358   | F | TGGGCGCGGACATGGAG                                     | 0,04 |
|                                  |            | R | tcattggatctcattaCAGCTCCTCGGTGCTCTGG                   | 0,04 |
|                                  | rs7412     | F | GCGATGCCGATGACCTGC                                    | 0,04 |
|                                  |            | R | tcattggatctcattaAGGCGCTCGCGGATGG                      | 0,04 |
| Universal adapter primer Uni-Cy5 |            |   | taatgagatccaatga                                      | 4    |

F – forward primer\$ R – reverse primer

#### *Microarray hybridization*

Multiplex PCR product mixture (20 µL) was added to 10 µL of 20×SSPE (Thermo Fisher Scientific, MA, USA) and 10 µl of formamide (Panreac, Spain). Microarray hybridization chambers were filled with 36 µL of resulting mixtures, and microarrays were incubated at 37°C for 6-12 hours. The microarray was washed after removal of the hybridization mixture with 1×SSPE for five minutes twice, then washed with distilled water and air dried.
