# Supplementary material for: Evaluation of the Polygenic Risk Score for Alzheimer’s Disease in Russian Patients with Dementia Using a Low-Density Hydrogel Oligonucleotide Microarray
Source: MDPI journal article supplement (doi:10.3390/ijms241914765), 2023-09-29
Supplement: s1 [file s1]

**Table S1.** Results of SNP identification using microarray-based assay.

| SNP (rsID) | Wild type<br>allele<br>homozygotes,<br>n (%) | Heterozygous,<br>n (%) | Minor allele<br>homozygotes,<br>n (%) | Hardy-<br>Weinberg<br>equilibrium,<br><i>p-value</i> | Benjamini-<br>Hochberg<br>adjusted <i>p-value</i> | Minor allele<br>frequency, % |
|------------|----------------------------------------------|------------------------|---------------------------------------|------------------------------------------------------|---------------------------------------------------|------------------------------|
| rs6656401  | 496 (57.2%)                                  | 301 (34.7%)            | 70 (8.1%)                             | 0.015                                                | 0.345                                             | 8.07                         |
| rs6733839  | 327 (37.7%)                                  | 414 (47.8%)            | 126 (14.5%)                           | 0.83                                                 | 1                                                 | 14.53                        |
| rs35349669 | 221 (25.5%)                                  | 458 (52.8%)            | 188 (21.7%)                           | 0.1                                                  | 1                                                 | 21.68                        |
| rs190982   | 371 (42.8%)                                  | 388 (44.7%)            | 108 (12.5%)                           | 0.71                                                 | 1                                                 | 12.46                        |
| rs9271192  | 393 (45.3%)                                  | 381 (44%)              | 93 (10.7%)                            | 1                                                    | 1                                                 | 10.73                        |
| rs10948363 | 513 (59.2%)                                  | 313 (36.1%)            | 41 (4.7%)                             | 0.5                                                  | 1                                                 | 4.73                         |
| rs2718058  | 385 (44.4%)                                  | 381 (43.9%)            | 101 (11.7%)                           | 0.65                                                 | 1                                                 | 11.65                        |
| rs1476679  | 505 (58.3%)                                  | 309 (35.6%)            | 53 (6.1%)                             | 0.52                                                 | 1                                                 | 6.11                         |
| rs11771145 | 318 (36.7%)                                  | 398 (45.9%)            | 151 (17.4%)                           | 0.18                                                 | 1                                                 | 17.42                        |
| rs28834970 | 414 (47.8%)                                  | 380 (43.8%)            | 73 (8.4%)                             | 0.3                                                  | 1                                                 | 8.42                         |
| rs9331896  | 332 (38.3%)                                  | 412 (47.5%)            | 123 (14.2%)                           | 0.83                                                 | 1                                                 | 14.19                        |
| rs10838725 | 426 (49.1%)                                  | 355 (40.9%)            | 86 (41%)                              | 0.34                                                 | 1                                                 | 9.92                         |
| rs983392   | 350 (40.4%)                                  | 410 (47.3%)            | 107 (12.3%)                           | 0.46                                                 | 1                                                 | 12.34                        |
| rs10792832 | 378 (43.6%)                                  | 387 (44.6%)            | 102 (11.8%)                           | 0.88                                                 | 1                                                 | 11.76                        |
| rs11218343 | 793 (91.5%)                                  | 74 (8.5%)              | 0 (0%)                                | 0.4                                                  | 1                                                 | 0.00                         |
| rs17125944 | 701 (80.9%)                                  | 159 (18.3%)            | 7 (0.8%)                              | 0.7                                                  | 1                                                 | 0.81                         |
| rs10498633 | 541 (62.4%)                                  | 280 (32.3%)            | 46 (5.3%)                             | 0.23                                                 | 1                                                 | 5.31                         |
| rs8093731  | 854 (98.5%)                                  | 13 (1.5%)              | 0 (0%)                                | 1                                                    | 1                                                 | 0.00                         |
| rs4147929  | 618 (71.3%)                                  | 231 (26.6%)            | 18 (2.1%)                             | 0.6                                                  | 1                                                 | 2.08                         |
| rs3865444  | 403 (46.5%)                                  | 371 (42.8%)            | 93 (10.7%)                            | 0.59                                                 | 1                                                 | 10.73                        |
| rs7274581  | 726 (83.7%)                                  | 136 (15.7%)            | 5 (0.6%)                              | 0.83                                                 | 1                                                 | 0.58                         |
| rs429358   | 640 (73.8%)                                  | 206 (23.8%)            | 21 (2.4%)                             | 0.34                                                 | 1                                                 | 2.42                         |
| rs7412     | 738 (85.1%)                                  | 124 (14.3%)            | 5 (0.6%)                              | 1                                                    | 1                                                 | 0.58                         |
